# Supplementary material for: Endocytosis, Distribution, and Exocytosis of Polystyrene Nanoparticles in Human Lung Cells
Source: MDPI journal article supplement (doi:10.3390/nano13010084), 2022-12-24
Supplement: s1 [file s1]

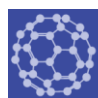

## Supplementary Materials

# Endocytosis, Distribution, and Exocytosis of Polystyrene Nanoparticles in Human Lung Cells

Yuan-Yuan Liu<sup>1,†</sup>, Jie Liu<sup>1,†</sup>, Hao Wu<sup>1</sup>, Qiangqiang Zhang<sup>1</sup>, Xue-Rui Tang<sup>1</sup>, Dan Li<sup>1</sup>, Chen-Si Li<sup>1</sup>, Yuanfang Liu<sup>1,2</sup>, Aoneng Cao<sup>1,\*</sup> and Haifang Wang<sup>1,\*</sup>

<sup>1</sup> Institute of Nanochemistry and Nanobiology, Shanghai University, Shanghai 200444, China

<sup>2</sup> Beijing National Laboratory for Molecular Sciences, College of Chemistry and Molecular Engineering, Peking University, Beijing 100871, China

<sup>†</sup> These authors contribute equally.

\* Correspondence: hwang@shu.edu.cn (H. Wang), ancao@shu.edu.cn (A. Cao)

This PDF file includes: Figures S1–S10.

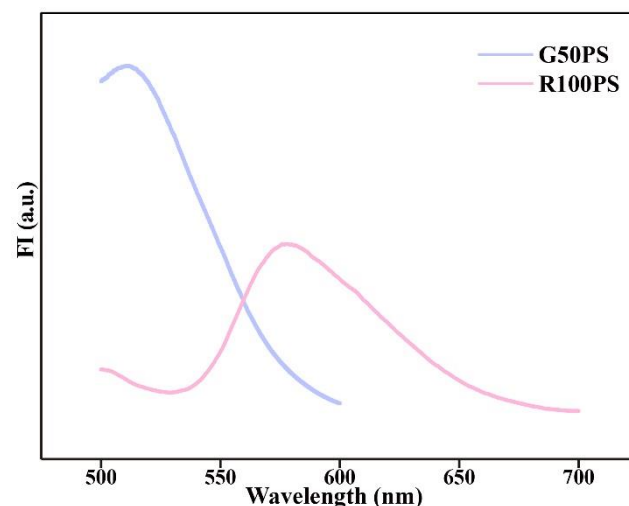

Figure S1. Fluorescence spectra of G50PS and R100PS (Ex 488 nm).

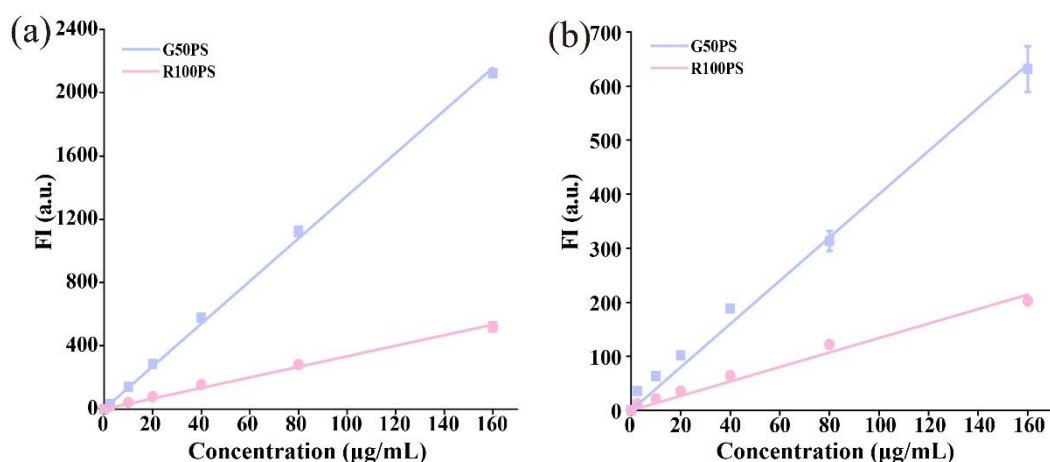

Figure S2. FIs of G50PS (Ex 488 nm/Em 508 nm) and R100PS (Ex 488 nm/Em 578 nm) at different concentrations in ultrapure water (a) and culture medium (b) (n=3).

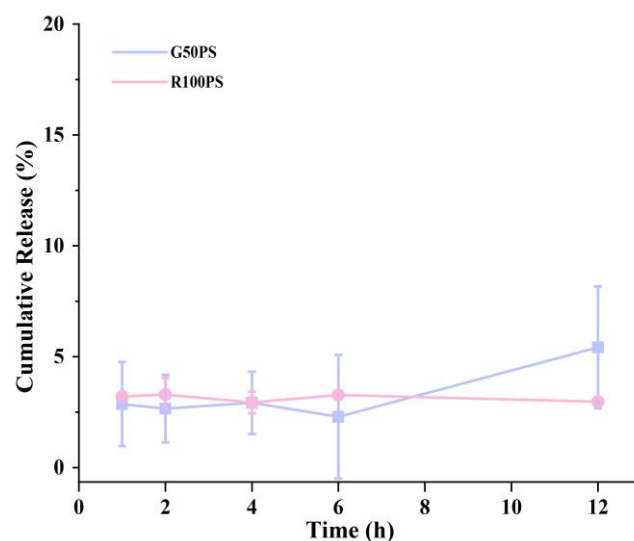

**Figure S3.** Fluorescence leakage from G50PS and R100PS incubated in culture medium at 37 °C for different time periods (n=3).

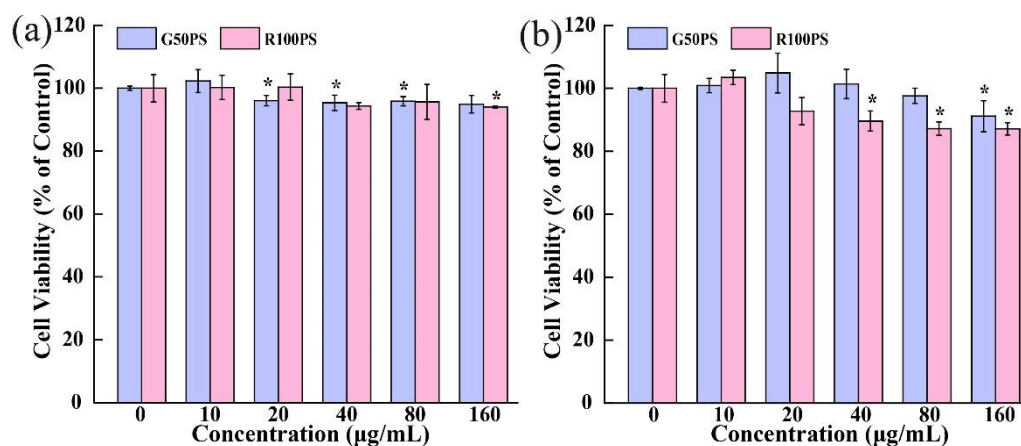

**Figure S4.** Viability of A549 cells (a) and BEAS-2B cells (b) after exposure to PS NPs for 24 h. \*P < 0.05 compared with the control (n=3).

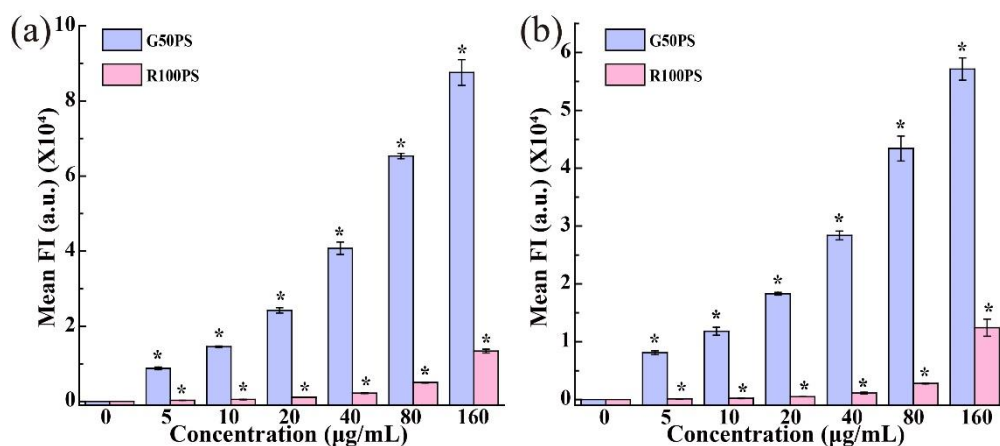

**Figure S5.** Cellular uptake of PS NPs after cells were incubated with different concentrations of PS NPs for 2 h. The mean FIs of A549 cells (a) and BEAS-2B cells (b) were measured by flow cytometry. \*P < 0.05 vs the control (n = 3).

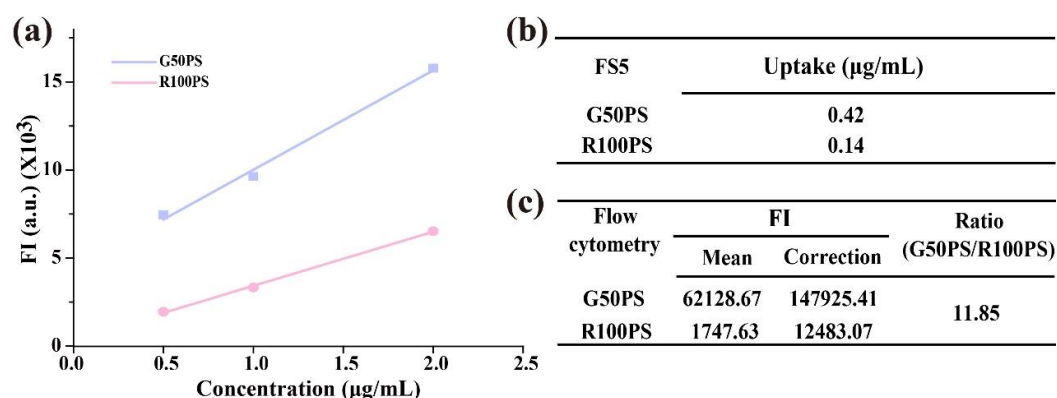

**Figure S6.** The external standard method was used to calibrate the cellular uptake of the PS NPs by flow cytometry. **(a)** FIs of G50PS (Ex 488 nm/Em 508 nm) and R100PS (Ex 488 nm/Em 578 nm) of different concentrations in the cell lysate samples. BEAS-2B cells were exposed to 20 µg/mL PS NPs for 4 h. The FIs were measured by the spectrometer FS5. **(b)** Cellular uptake of the PS NPs calculated based on the data in (a). **(c)** Calibration ratio of the fluorescence results of G50PS (Ex 488 nm/Em 508 nm) and R100PS (Ex 488 nm/Em 578 nm) measured by flow cytometry.

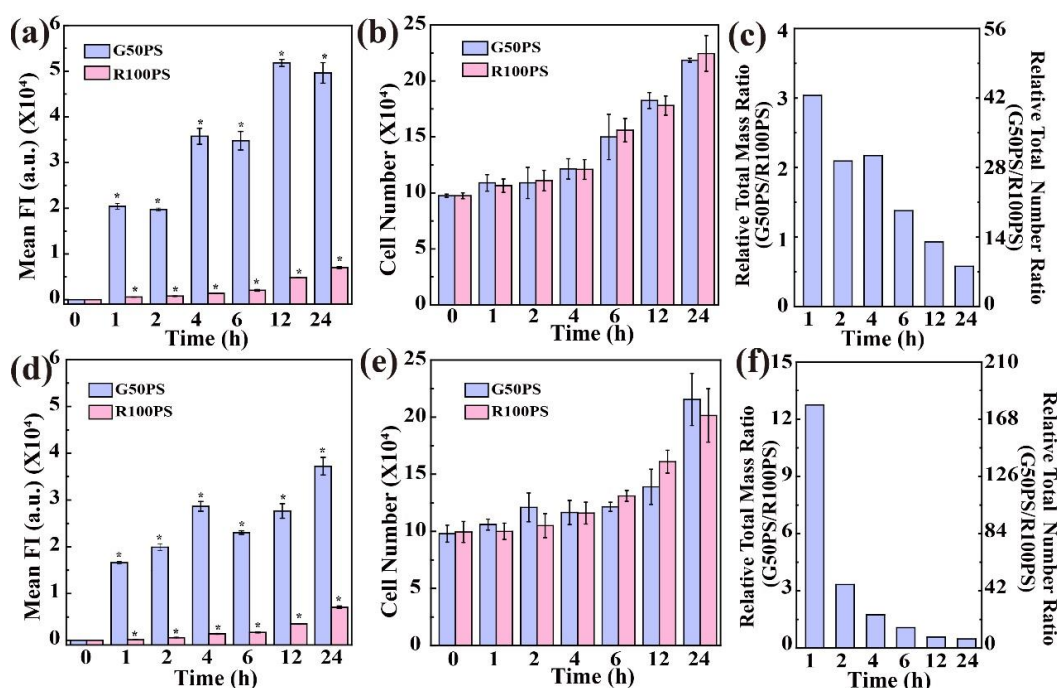

**Figure S7.** Cellular uptake of PS NPs after cells were exposed to PS NPs (20 µg/mL) for different times. **(a and d)** Mean FIs in A549 cells **(a)** and BEAS-2B cells **(d)**. **(b and e)** Cell numbers of A549 cells **(b)** and BEAS-2B cells **(e)**. **(c and f)** Relative total mass (left y-axis)/number (right y-axis) uptake ratios (G50PS/R100PS) of A549 cells **(c)** and BEAS-2B cells **(f)**. \*P < 0.05 compared with the control (n=3).

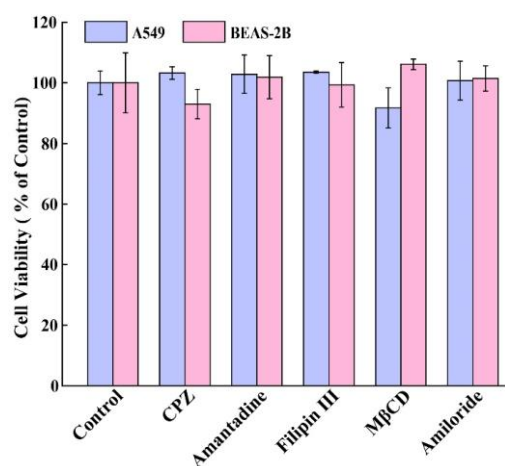

**Figure S8.** Viability of A549 cells and BEAS-2B cells after exposure to each endocytosis inhibitor for 4 h (n=3).

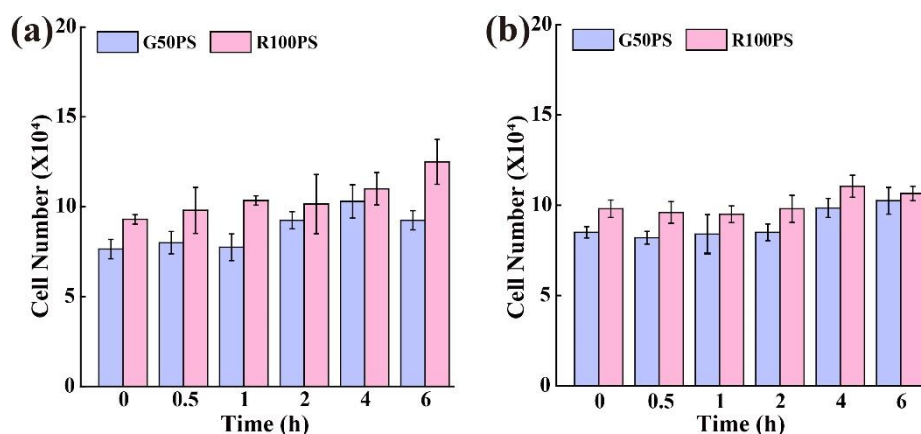

**Figure S9.** Cell number of A549 cells (a) and BEAS-2B cells (b) during the exocytosis process of PS NPs. (n=3).

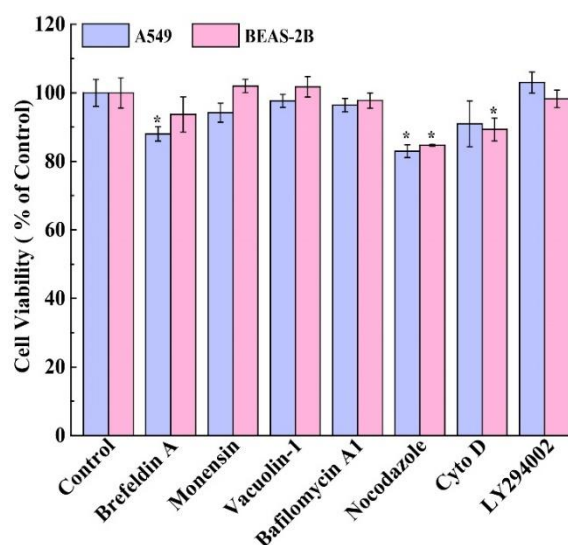

**Figure S10.** Viability of A549 cells and BEAS-2B cells after exposure to each exocytosis inhibitor for 4 h (n=3).
